# Supplementary material for: SnowyOwl: accurate prediction of fungal genes by using RNA-Seq and homology information to select among ab initio models
Source: PubMed Central journal article supplement (PMC4084796; doi:10.1186/1471-2105-15-229), 2014-07-01
Supplement: 1471-2105-15-229-S6.pdf [file 1471-2105-15-229-S6.pdf]

## ***Discarded pipeline components***

These modules were used during development of the SnowyOwl pipeline but not included in the final version.

## **Orthologs**

The Uniprot-Swissprot database [1] was searched with the six-frame translation of the genomic sequence using DeCypher GeneDetective running on TimeLogic boards [2] to identify subsequences of the genome that encode homologs of known proteins. The structures of the transcripts corresponding to these subsequences were then refined using in-house scripts that took into account RNASeq coverage (for donor and acceptor sites) and potential frame shifts (genome assembly errors) identified using ESTScan [3]. The subset of the resulting gene models that were also found in at least one of GeneMark Models or Contig Models were used to train Augustus [4; 5].

## **Augustus Domains**

Multiple sequence alignments of proteins representing 92 of the Glycoside Hydrolase families [6; 7] found in fungi were generated and then converted to block profiles as described in [8]. Augustus with the PPX extension [8], trained with the Consensus Training Set, was run on the entire genome for each profile. The resulting gene models were incorporated into the Pooled Augustus Models.

## **References**

- 1 **Uniprot-Swissprot Database**  
[ftp://ftp.uniprot.org/pub/databases/uniprot/current\_release/knowledgebase/complete/uniprot\_sprot.fasta.gz]
- 2 **TimeLogic** [http://www.timelogic.com]
- 3 Lottaz C, Iseli C, Jongeneel CV, Bucher P: **Modeling sequencing errors by combining Hidden Markov models**. *Bioinformatics* 2003, **19 Suppl 2**:ii103-12.
- 4 Stanke M, Waack S: **Gene prediction with a hidden Markov model and a new intron submodel**. *Bioinformatics* 2003, **19 Suppl 2**:ii215-25.

- 5 Stanke M, Schoffmann O, Morgenstern B, Waack S: **Gene prediction in eukaryotes with a generalized hidden Markov model that uses hints from external sources.** *BMC Bioinformatics* 2006, **7**:62.
- 6 Henrissat B, Bairoch A: **Updating the sequence-based classification of glycosyl hydrolases.** *Biochem J* 1996, **316**:695-696.
- 7 **CAZy - GH** [<http://www.cazy.org/Glycoside-Hydrolases.html>]
- 8 Keller O, Kollmar M, Stanke M, Waack S: **A novel hybrid gene prediction method employing protein multiple sequence alignments.** *Bioinformatics* 2011, **27**:757-763.
